# Supplementary material
Source: publisher figshare collection journal article supplement (https://springernature.figshare.com/ndownloader/files/20222409)
Supplement: Supplementary file 1 [file 20222409]

## Sheet: Sheet1
Date	Time (UTC)	Latitude (deg)	Longitude (deg)	Depth (km)	Magnitude
2018-09-28	10:14:22	0.101092	119.808	13.088	6.4
2018-09-28	10:16:51	-0.761388	119.98	10.378	6.2
2018-09-28	10:25:06	-0.943956	119.926	11.915	6.1
2018-09-28	10:39:05	-0.643513	119.913	12.678	5.8
2018-09-28	10:47:46	-0.429803	119.94	11.763	5.2
2018-09-28	10:50:27	-0.761992	119.998	15.784	6.1
2018-09-28	11:06:52	-1.5473	119.986	12.98	5.4
2018-09-28	11:39:13	-0.602026	119.782	7.816	4.7
2018-09-28	11:48:14	0.455636	119.983	11.22	4.3
2018-09-28	12:05:04	-0.321777	119.763	15.293	4.8
2018-09-28	12:14:18	-0.551425	119.904	9.494	4.2
2018-09-28	12:20:23	-1.79124	119.708	4.202	4.7
2018-09-28	12:27:34	-0.373698	119.955	12.63	5.2
2018-09-28	12:39:36	-1.05961	120.165	10.098	4.8
2018-09-28	13:10:27	-0.022127	119.728	13.201	5
2018-09-28	13:23:43	-0.55491	119.836	14.291	4.2
2018-09-28	13:28:48	-0.966304	119.481	11.419	4.5
2018-09-28	13:35:31	0.092701	119.613	5.966	5.8
2018-09-28	13:52:06	-1.57172	120.226	11.891	4
2018-09-28	13:55:09	-2.3766	120.999	13.109	4.3
2018-09-28	13:56:50	0.014107	119.6	5.296	4.6
2018-09-28	14:01:54	-0.903369	119.935	11.745	3.8
2018-09-28	14:06:13	0.073026	119.584	2.532	4.1
2018-09-28	14:10:08	0.000987	119.743	7.17	5
2018-09-28	14:16:05	-1.45653	119.965	9.405	4.7
2018-09-28	14:20:53	-0.766817	119.574	12.475	4.1
2018-09-28	14:22:39	-1.96812	121.002	5.497	4.4
2018-09-28	14:26:02	0.107451	119.527	12.54	5.4
2018-09-28	14:44:30	-1.57438	120.338	9.338	4.4
2018-09-28	14:52:46	-0.111096	119.811	11.122	3.7
2018-09-28	14:59:35	-0.488789	119.948	11.323	3.9
2018-09-28	15:05:25	-1.69857	120.382	8.735	3.8
2018-09-28	15:10:02	-1.58385	120.238	8.481	4.5
2018-09-28	15:13:31	-0.035372	120.061	8.054	4
2018-09-28	15:20:45	0.203292	119.584	9.651	4.2
2018-09-28	15:28:14	-0.647874	119.962	14.97	4.9
2018-09-28	15:35:43	-1.21436	119.729	9.461	4.9
2018-09-28	15:51:55	-1.11271	119.942	9.725	3.9
2018-09-28	15:58:21	0.029348	119.693	3.368	4.6
2018-09-28	16:01:55	0.202843	119.856	3.54	4.2
2018-09-28	16:18:41	-2.04893	120.991	6.292	4.2
2018-09-28	16:40:04	-0.221265	119.695	6.587	4.3
2018-09-28	16:55:11	-1.44164	119.961	10.866	4.6
2018-09-28	17:02:10	-0.590445	119.962	15.625	4.5
2018-09-28	17:05:47	-1.31322	120.089	9.6	4.7
2018-09-28	17:10:51	0.00634	120.002	14.028	3.9
2018-09-28	17:16:22	-0.03543	119.871	12.37	4.5
2018-09-28	17:26:48	-0.397584	119.959	8.739	3.9
2018-09-28	17:34:14	0.069849	119.596	2.348	4.2
2018-09-28	17:54:46	-0.120452	119.429	8.128	4.2
2018-09-28	18:21:43	0.324105	119.955	11.796	4.3
2018-09-28	19:04:53	-0.054757	119.738	7.105	4.5
2018-09-28	19:12:55	-0.404992	119.926	11.548	4.2
2018-09-28	19:21:25	-1.5119	120.275	8.409	4.4
2018-09-28	20:02:53	-1.44533	120.304	8.945	4.3
2018-09-28	20:25:29	-1.70889	120.232	9.73	4.5
2018-09-28	20:34:53	-1.2612	120.099	9.587	4.6
2018-09-28	20:41:03	-1.52453	120.199	8.288	4.7
2018-09-28	21:17:08	-1.4236	119.604	15.687	4.6
2018-09-28	21:24:02	-1.57154	120.185	8.907	5.1
2018-09-28	21:59:06	-0.52011	120.07	9.573	4.2
2018-09-28	22:14:47	-1.6179	120.2	9.876	3.9
2018-09-28	22:17:52	-1.58902	120.18	9.978	4.8
2018-09-28	22:55:36	-2.28919	120.951	11.852	3.5
2018-09-28	23:01:51	-1.02376	119.837	12.311	4.1
2018-09-28	23:03:09	-1.21764	119.941	10.015	4
2018-09-28	23:21:29	-0.656793	119.958	10.326	3.9
2018-09-28	23:29:37	-1.27832	120.046	10.79	4.7
2018-09-28	23:35:20	0.113521	119.649	3.111	4.1
2018-09-29	00:00:24	-1.67545	120.363	12.105	4.3
2018-09-29	00:05:18	-0.331335	119.969	9.783	3.9
2018-09-29	00:14:03	-0.11056	119.864	13.758	4.1
2018-09-29	00:19:02	-0.522705	120.017	17.586	4.4
2018-09-29	00:27:23	-1.37801	120.043	10.425	4.5
2018-09-29	00:38:03	-2.53167	121.019	7.781	4.5
2018-09-29	00:47:52	-1.51545	120.253	9.718	4.2
2018-09-29	00:57:11	-2.34148	120.925	11.668	3.6
2018-09-29	01:00:07	-1.554	120.16	10.092	3.8
2018-09-29	01:14:58	-1.3737	120.114	10.667	4.1
2018-09-29	01:16:39	-1.34983	120.075	11.54	4.1
2018-09-29	01:18:37	-1.23437	119.982	10.096	4.5
2018-09-29	01:21:14	-1.37622	120.167	10.722	4
2018-09-29	01:43:35	-1.28172	120.062	9.934	4
2018-09-29	01:46:18	-1.51188	120.181	10.467	4.4
2018-09-29	02:11:49	-1.50786	120.06	9.69	3.9
2018-09-29	02:15:44	-1.28229	120.101	10.617	4.1
2018-09-29	02:32:52	-1.51309	119.943	10.53	5.2
2018-09-29	02:54:26	-1.50564	120.041	9.581	4.4
2018-09-29	03:00:41	-1.85756	120.223	12.54	3.9
2018-09-29	03:23:44	-1.38061	120.067	11.51	3.6
2018-09-29	04:11:10	-1.18648	120.058	12.626	3.5
2018-09-29	04:49:40	-1.58928	120.002	11.216	3.8
2018-09-29	05:15:22	-1.51096	120.202	8.903	3.6
2018-09-29	05:22:37	-1.16081	119.975	12.715	4.1
2018-09-29	05:24:03	-1.29081	119.969	10.241	4.3
2018-09-29	06:08:49	-0.70651	119.813	7.887	3.5
2018-09-29	06:36:13	-1.33937	120.649	11.397	4.6
2018-09-29	06:43:51	-1.47437	119.878	11.402	4.3
2018-09-29	07:34:03	-1.5829	119.448	11.32	3.8
2018-09-29	07:40:12	-1.54373	120.146	12.91	5.1
2018-09-29	08:16:15	-1.29705	119.925	8.255	3.6
2018-09-29	08:21:49	-1.41246	119.946	8.684	3.6
2018-09-29	08:37:07	-0.053339	119.976	11.576	4.4
2018-09-29	08:53:18	-1.05096	119.894	8.98	3.8
2018-09-29	09:34:14	-1.29667	120.079	8.365	3.9
2018-09-29	09:42:14	-1.02667	119.879	11.291	3.7
2018-09-29	09:48:13	-1.62662	119.869	12.638	3.4
2018-09-29	09:54:26	-0.073186	119.753	12.099	4.5
2018-09-29	10:04:23	-1.474	119.767	9.044	3.5
2018-09-29	10:30:19	-1.46317	120.21	16.812	5
2018-09-29	10:41:33	-0.012846	120.026	11.21	3.8
2018-09-29	10:48:50	-1.21164	119.623	12.772	3.5
2018-09-29	11:06:25	-0.617837	120.002	9.139	4.6
2018-09-29	11:36:03	-1.27902	120.079	12.313	4
2018-09-29	12:11:08	-0.724863	119.996	10.927	4.4
2018-09-29	12:21:45	-1.23318	120.378	9.846	3.9
2018-09-29	12:48:48	-1.50167	120.173	9.788	3.7
2018-09-29	12:57:31	-1.58231	120.332	11.173	3.5
2018-09-29	14:11:09	-0.605083	119.964	9.835	3.6
2018-09-29	14:26:19	-1.51555	120.106	12.21	4.5
2018-09-29	14:30:24	-1.52337	120.086	11.163	4
2018-09-29	15:12:48	-0.936965	119.652	10.644	3.7
2018-09-29	15:40:17	-0.107437	119.837	12.335	3.9
2018-09-29	15:41:52	-1.34957	120.158	9.388	3.9
2018-09-29	15:49:39	-0.365517	119.838	14.387	3.5
2018-09-29	15:54:59	-1.62704	120.266	8.424	3.2
2018-09-29	16:07:36	-1.55567	120.021	12.373	4
2018-09-29	16:30:46	-1.30016	119.962	10.85	4.2
2018-09-29	16:36:07	-0.056841	119.859	9.612	3.7
2018-09-29	17:15:21	-1.13489	120.073	10.898	4.4
2018-09-29	17:19:09	-1.24543	120.104	9.539	4.1
2018-09-29	17:57:58	0.098627	119.38	7.664	4.2
2018-09-29	18:08:56	-0.956971	119.576	6.54	3.1
2018-09-29	18:30:47	-1.22589	120.168	8.466	4
2018-09-29	18:40:33	-1.33229	119.546	9.681	4.3
2018-09-29	18:57:32	-0.313897	119.72	9.586	3.5
2018-09-29	19:07:48	-2.35692	121.11	12.817	3.8
2018-09-29	19:15:40	-1.4749	120.081	9.625	4.7
2018-09-29	20:02:03	-1.20371	120.17	9.831	3.9
2018-09-29	20:09:19	-1.49757	120.021	9.806	4.4
2018-09-29	20:22:21	-0.558506	119.915	13.528	4
2018-09-29	20:53:03	-1.26366	120.335	8.191	3.4
2018-09-29	20:59:36	-1.59863	120.096	10.739	3.6
2018-09-29	21:28:18	-1.40929	119.9	8.86	3.5
2018-09-29	21:42:27	-0.428272	119.996	9.179	4.2
2018-09-29	23:40:22	-0.885831	119.984	10.429	3.6
2018-09-29	23:48:58	-1.46237	120.024	9.061	3.8
2018-09-29	23:54:50	0.034779	119.671	9.679	4.3
2018-10-01	00:30:06	-1.24404	120.031	11.267	3.9
2018-10-01	01:44:19	-0.126656	120.116	9.422	3.6
2018-10-01	02:12:59	-1.49174	119.774	13.883	3.7
2018-10-01	03:22:59	-1.28521	120.015	12.216	3.8
2018-10-01	03:56:29	-0.727497	119.882	12.567	3.7
2018-10-01	05:43:34	0.041885	119.608	7.879	5.4
2018-10-01	10:06:08	-0.646416	119.967	10.652	4.2
2018-10-01	11:54:59	-0.725271	119.741	12.811	3.4
2018-10-01	12:07:58	-1.25695	119.997	9.327	3.7
2018-10-01	13:51:01	0.046505	119.662	6.16	3.5
2018-10-01	14:34:00	-1.18226	119.301	9.923	3.7
2018-10-01	16:01:39	-0.485618	119.969	10.222	3.9
2018-10-01	16:15:08	-0.617271	119.937	10.689	4.1
2018-10-01	17:39:02	-0.575616	119.871	10.954	4.9
2018-10-01	18:53:31	-0.121678	119.652	12.573	3.9
2018-10-01	19:22:13	-1.31079	120.077	9.548	4.7
2018-10-01	19:35:16	-1.15321	120.102	8.859	3.7
2018-10-01	20:22:02	-0.632745	119.712	10.766	3.1
2018-10-01	20:35:05	-1.62993	120.373	7.782	3.3
2018-10-01	22:35:20	0.177047	119.611	5.753	3.6
2018-10-01	23:46:41	-0.687372	119.812	10.521	5.2
2018-10-02	01:21:53	-1.66782	120.27	8.62	3.3
2018-10-02	02:36:21	0.110459	119.511	6.124	4.2
2018-10-02	04:59:27	-1.65005	120.206	10.269	5.4
2018-10-02	06:07:26	-0.076283	119.858	3.013	4.4
2018-10-02	07:56:11	-0.573855	119.759	9.35	4.6
2018-10-02	08:02:55	-1.43366	120.329	10.182	4
2018-10-02	09:45:22	-1.89968	121.117	12.332	4.7
2018-10-02	13:43:05	-1.38682	119.386	8.285	3.4
2018-10-02	13:48:44	-1.47307	120.185	11.831	3.7
2018-10-02	13:56:14	-0.357829	119.758	6.678	3.2
2018-10-02	14:21:37	0.013283	119.677	2.721	3.4
2018-10-02	14:42:47	-0.237227	119.811	3.864	3.3
2018-10-02	15:08:44	0.290379	119.388	3.754	3.9
2018-10-02	16:08:18	-1.32331	119.961	7.797	3.2
2018-10-02	16:59:18	-1.2571	119.995	13.066	3.6
2018-10-02	17:07:30	-1.67547	120.017	9.302	4
2018-10-02	17:13:31	-0.595698	120.028	10.434	3.8
2018-10-02	19:10:55	-0.210695	119.606	14.079	3.8
2018-10-02	21:06:56	-0.970269	119.991	10.978	4.7
2018-10-02	21:30:46	-0.057913	119.841	12.214	4
2018-10-02	22:59:12	-1.37671	120.012	10.124	3.4
2018-10-03	01:00:10	-1.17869	120.144	10.284	3.8
2018-10-03	03:33:57	-0.699073	119.905	10.736	4
2018-10-03	04:44:22	-0.987296	119.895	10.588	4.5
2018-10-03	06:14:12	-2.26663	120.913	9.245	4.8
2018-10-03	06:21:47	-2.31638	120.948	14.872	4.4
2018-10-03	06:31:06	-1.6572	120.324	8.255	4.5
2018-10-03	08:02:51	-0.889456	120.046	7.205	4
2018-10-03	08:50:07	-0.878612	119.951	10.496	4.3
2018-10-03	09:00:31	-1.75626	119.832	11.501	4
2018-10-03	09:15:46	-2.23676	120.892	10.328	4.7
2018-10-03	11:10:22	-1.43924	119.978	9.996	4.5
2018-10-03	12:12:59	-0.831645	119.94	11.414	3.6
2018-10-03	12:34:31	-1.63521	120.23	9.473	3.6
2018-10-03	14:11:02	-0.133571	119.522	15.902	3.5
2018-10-03	16:34:02	-1.31442	119.941	13.573	3.3
2018-10-03	16:51:36	-1.42628	119.953	10.501	4.4
2018-10-03	18:10:19	0.053125	119.48	8.919	4.2
2018-10-03	18:15:07	0.076514	119.867	14.994	4.7
2018-10-03	18:18:42	-1.19574	120.373	10.311	3.4
2018-10-03	20:06:46	-1.22875	120.248	10.751	3.4
2018-10-03	22:08:38	0.302245	119.279	12.599	3.5
2018-10-03	22:13:10	-1.31594	120.157	12.694	3.9
2018-10-03	22:37:41	-1.72601	120.313	14.905	3.1
2018-10-03	23:06:18	-2.26641	120.875	9.225	3.6
2018-10-03	23:11:57	0.406951	119.377	12.727	3.9
2018-10-04	01:54:32	-1.58352	120.184	9.402	3.6
2018-10-04	03:18:12	-0.936723	120.008	9.711	3.8
2018-10-04	15:29:24	-1.33204	119.987	9.438	3.4
2018-10-04	18:27:26	-1.24752	120.565	10.504	4.7
2018-10-04	18:30:21	-1.31517	120.61	16.499	4.4
2018-10-04	18:45:43	-1.21627	120.488	12.121	3.3
2018-10-04	20:40:34	-1.26413	120.673	13.199	4.5
2018-10-04	21:14:13	-1.23552	120.426	12.823	3.2
2018-10-04	22:07:20	-1.19039	120.328	9.909	4.5
2018-10-04	22:07:22	-1.16385	120.488	10.126	4.6
2018-10-04	22:08:35	-1.18558	120.382	10.742	4.7
2018-10-05	00:16:46	-1.56007	120.425	10.551	3.2
2018-10-05	05:19:29	-1.18372	120.331	10.124	3.7
2018-10-05	06:32:39	-1.05107	119.846	9.876	3.7
2018-10-05	10:37:33	0.395346	119.697	10.374	4.6
2018-10-05	14:08:37	-1.6678	120.418	9.937	4
2018-10-06	01:11:45	-0.34476	119.856	10.451	4.3
2018-10-06	03:10:27	-1.45805	120.133	9.695	4
2018-10-06	04:32:33	-1.36353	119.9	10.864	3.8
2018-10-06	06:22:16	-1.57375	120.235	10.347	3.7
2018-10-06	12:45:11	-2.00598	120.059	11.63	3.3
2018-10-06	16:48:42	-0.810384	119.995	8.722	3.2
2018-10-06	17:11:22	-1.48954	120.013	10.582	3.6
2018-10-07	04:09:46	-1.40688	120.802	12.399	3.8
2018-10-07	05:42:05	-1.44009	119.972	11.359	3.9
2018-10-07	07:07:48	-1.56996	120.257	10.039	4
2018-10-07	07:29:39	0.085527	119.537	8.676	4.4
2018-10-07	08:18:15	-0.36571	119.695	8.239	3.7
2018-10-07	10:35:04	-1.93909	120.645	11.432	3.8
2018-10-07	12:47:07	-1.21559	119.877	11.234	3.8
2018-10-07	14:04:51	-0.738422	120.031	11.13	3.8
2018-10-07	16:32:18	0.10211	119.547	8.157	3.5
2018-10-07	20:30:45	-1.54017	120.179	10.422	4.1
2018-10-07	21:02:56	-0.145544	119.691	8.035	3.5
2018-10-07	23:03:42	-0.61032	119.803	6.997	4
2018-10-08	05:15:37	-1.66147	120.408	9.012	4.3
2018-10-08	12:43:34	-1.44341	120.07	10.103	4
2018-10-08	21:03:28	-0.82734	119.967	9.07	4.1
2018-10-08	21:15:47	-0.856018	120.005	13.204	5
2018-10-08	21:59:56	-1.25246	120.621	13.316	4.8
2018-10-09	04:44:54	-1.70168	120.154	9.762	3.3
2018-10-09	09:09:10	-1.07894	120.574	10.763	3.9
2018-10-09	11:25:11	0.082074	119.949	11.208	3
2018-10-09	15:28:07	-1.29273	120.109	9.545	3.4
2018-10-09	16:10:24	-0.474569	119.961	10.199	3.2
2018-10-09	19:35:39	-2.23831	120.657	10.633	3.3
2018-10-09	20:44:38	-0.656309	119.967	15.92	3.6
2018-10-09	21:37:49	-1.03928	119.795	9.307	3.2
2018-10-10	01:54:13	-1.67204	120.116	6.898	3.4
2018-10-10	03:45:59	-1.29148	120.59	8.495	3.2
2018-10-10	04:47:01	-1.50573	120.184	9.767	3.6
2018-10-10	07:25:22	-0.359078	120.049	9.555	4.5
2018-10-10	11:00:08	-1.10709	120.31	5.438	3.4
2018-10-11	11:53:56	-1.67668	120.281	8.737	4.8
2018-10-11	21:46:56	-1.6768	120.125	10.188	4.3
2018-10-12	01:26:45	-1.58498	120.063	10.746	4.1
2018-10-12	09:38:54	-1.18102	119.642	6.928	3.9
2018-10-12	17:48:38	0.009413	120.047	15.62	3.7
2018-10-12	19:05:43	-1.6128	120.368	9.417	3.4
2018-10-13	03:28:14	0.158129	119.32	6.643	4.2
2018-10-14	06:22:19	-0.655634	120.026	12.55	3.4
2018-10-14	19:39:04	-1.50033	120.117	10.872	3.1
2018-10-14	20:42:53	-1.55009	120.385	9.82	3
2018-10-15	05:44:15	-1.23055	120.189	8.675	3.2
2018-10-15	06:48:56	-2.52943	120.985	9.478	3.7
2018-10-15	21:50:37	-0.974079	119.836	16.29	3.7
2018-10-15	22:42:45	-1.58443	120.273	8.201	3.5
2018-10-16	04:08:42	-0.76227	120.246	8.209	3.2
2018-10-16	07:37:33	-1.33547	120.077	11.369	3.1
2018-10-16	07:50:39	-1.29396	119.903	11.296	3.3
2018-10-16	19:06:18	-1.56868	120.383	8.911	4.6
2018-10-16	19:18:12	-1.57193	120.41	10.787	3.7
2018-10-16	19:49:11	-1.5911	120.339	7.942	3.4
2018-10-16	19:50:42	-1.53716	120.38	10.529	3.5
2018-10-16	20:23:56	-1.35786	120.079	9.936	3.8
2018-10-16	21:04:34	-1.5219	120.315	8.452	3.6
2018-10-17	13:20:11	-1.30275	120.073	6.519	3.2
2018-10-18	06:38:56	-2.24904	120.92	7.473	3.5
2018-10-18	14:53:17	-1.49449	120.206	10.638	3.2
2018-10-18	15:21:05	-1.56268	120.427	10.244	3
2018-10-18	22:03:52	-1.33507	120.192	20.78	3.4
2018-10-19	02:47:08	-0.961451	120.023	8.663	3.4
2018-10-19	13:36:38	-1.63829	120.002	11.129	4
2018-10-20	05:17:59	-1.53598	120.308	7.143	3.5
2018-10-20	05:21:17	-1.80672	120.572	13.577	4.7
2018-10-20	07:12:59	-1.26359	120.33	10.057	3.6
2018-10-20	09:27:22	-1.8788	120.698	11.585	4.2
2018-10-21	02:58:06	-1.09197	120.656	10.608	4.1
2018-10-21	04:29:00	-1.37141	120.755	12.118	4.6
2018-10-21	07:03:39	-1.46905	120.332	11.005	3.9
2018-10-22	01:09:52	-0.809599	120.148	10.806	3.8
2018-10-22	02:24:09	-2.51404	121.01	11.023	3.2
2018-10-22	13:11:44	0.046525	119.875	11.231	3.3
2018-10-22	16:07:52	-1.70398	120.205	27.887	5
2018-10-22	16:13:14	-1.73426	120.142	11.505	4.8
2018-10-23	00:14:52	0.012092	120.217	14.431	3.1
2018-10-23	04:11:22	-1.2894	120.014	8.872	3.6
2018-10-23	04:50:19	-0.961162	120.252	10.64	4
2018-10-23	05:53:20	-1.32027	119.868	16.217	3.4
2018-10-23	08:14:10	-0.303481	119.962	9.363	4.5
2018-10-23	22:14:26	-1.10072	120.112	9.195	4
2018-10-24	03:01:22	-1.61411	120.34	10.832	4.2
2018-10-24	09:02:34	-1.58784	120.239	9.826	4.2
2018-10-24	12:59:01	-1.86952	120.461	10.528	3.2
2018-10-25	03:30:08	-0.188814	119.934	12.554	3.9
2018-10-25	07:03:23	-0.451228	120.112	13.756	4
2018-10-26	08:37:56	-1.21619	120.375	10.725	3.3
2018-10-26	17:20:14	-1.17238	119.971	11.583	3.2
2018-10-26	21:59:41	-0.946731	120.132	17.942	3
2018-10-27	17:01:39	-0.704199	119.969	9.345	3.3
2018-10-27	19:40:48	-1.38498	120.307	8.91	4
2018-10-27	22:09:57	-1.67053	120.329	9.413	4.2
2018-10-28	05:58:28	-1.2499	119.83	7.341	3.8
2018-10-28	09:15:31	-1.34402	120.003	9.292	4.1
2018-10-28	19:32:33	-1.64035	120.347	11.148	4.3
2018-10-29	02:04:53	-1.4385	119.944	11.888	3.5
2018-10-29	13:35:59	-1.6333	120.38	27.511	3.8
2018-10-30	00:45:00	-1.77863	120.554	14.624	3.5
2018-10-30	05:33:31	-2.08517	120.481	8.191	3.5
2018-10-31	20:48:41	-1.57107	120.246	9.185	3.5
2018-11-01	16:49:08	-1.1807	120.442	9.639	3.3
2018-11-01	17:59:20	-1.12225	120.804	8.205	3.8
2018-11-01	18:25:48	-0.670987	120.019	7.139	3.4
2018-11-02	03:04:47	-1.22175	120.699	12.606	5
2018-11-02	04:54:38	-1.60588	119.826	8.217	3
2018-11-02	15:17:27	-1.43409	119.937	11.496	3.2
2018-11-02	15:25:55	-2.97153	119.886	10.792	2.7
2018-11-02	19:14:55	-2.93301	119.529	9.649	3.6
2018-11-02	19:40:40	-2.90615	119.588	10.834	3.7
2018-11-02	20:46:38	-2.79833	119.495	7.896	2.6
2018-11-02	21:06:32	-1.19029	120.436	12.198	4.8
2018-11-02	21:33:37	-1.18637	120.484	12.366	4.8
2018-11-03	01:25:46	-1.23977	120.442	10.251	3.4
2018-11-03	02:30:14	-2.98103	119.545	10.881	4.7
2018-11-03	02:39:11	-2.82834	119.532	9.591	3
2018-11-03	02:42:55	-2.88101	119.522	9.51	2.8
2018-11-03	02:58:42	-2.84598	119.488	8.266	3.4
2018-11-03	02:58:43	-2.93238	119.528	12.502	3.4
2018-11-03	03:41:08	-2.94654	119.559	14.287	4.2
2018-11-03	05:04:01	-2.88132	119.497	10.191	4.4
2018-11-03	05:26:10	-2.77652	119.489	7.488	3.4
2018-11-03	05:26:10	-2.76999	119.498	8.35	3.5
2018-11-03	08:21:32	-2.8114	119.5	10.316	3
2018-11-03	08:44:06	-2.91563	119.53	10.262	4.8
2018-11-03	09:09:53	-2.74506	119.487	8.935	3.8
2018-11-03	09:28:20	-2.73019	119.468	8.097	3.1
2018-11-03	09:47:35	-2.72588	119.567	13.759	3.3
2018-11-03	12:26:18	-2.85949	119.526	12.545	3.4
2018-11-03	13:18:40	-0.416645	120.003	10.073	4
2018-11-03	16:42:00	-2.72571	119.472	7.281	2.9
2018-11-03	17:03:39	-1.26929	120.49	10.31	4.2
2018-11-03	17:07:58	-1.56665	120.076	9.816	3.4
2018-11-03	17:33:04	-1.56402	119.48	9.265	3.1
2018-11-03	17:36:38	-2.83496	119.578	14.373	2.1
2018-11-03	17:45:43	-2.71865	119.476	8.667	2.3
2018-11-03	18:21:51	-1.14609	120.34	10.714	3
2018-11-03	18:30:10	-1.28124	119.842	10.06	3.5
2018-11-03	19:01:33	-2.90106	119.512	11.023	3.1
2018-11-03	21:39:12	-2.92881	119.495	8.986	4.7
2018-11-03	22:03:49	-2.64563	119.452	9.888	2.5
2018-11-03	22:14:24	-2.95216	119.484	8.103	4.6
2018-11-03	23:41:59	-2.78479	119.459	7.84	2.8
2018-11-04	01:30:23	-2.79948	119.47	10.482	3.4
2018-11-04	06:08:36	-2.81762	119.518	10.707	3.2
2018-11-04	09:50:18	-1.52424	120.188	10.161	4
2018-11-04	13:29:34	-2.84428	119.509	11.511	3.4
2018-11-04	15:28:18	-0.50819	120.037	10.997	4
2018-11-04	17:19:51	-0.600292	120.148	21.938	3.1
2018-11-04	19:57:46	-1.51797	120.224	12.569	3.1
2018-11-04	20:53:11	-2.8285	119.538	11.368	2.7
2018-11-04	20:59:08	-2.75096	119.43	2.959	2.7
2018-11-05	13:42:45	-1.15236	119.733	10.93	3.3
2018-11-05	13:44:30	-1.56664	120.158	9.301	3.2
2018-11-05	18:35:53	-2.9301	119.479	6.927	5.2
2018-11-05	18:48:11	-2.92977	119.442	9.576	3.9
2018-11-05	18:53:12	-2.79896	119.5	9.833	3
2018-11-05	19:05:47	-2.98927	119.471	8.344	3.5
2018-11-05	19:16:08	-2.88847	119.492	10.662	3.1
2018-11-05	19:20:16	-2.7537	119.444	13.959	2.7
2018-11-05	19:23:22	-2.97062	119.497	11.283	3.1
2018-11-05	19:31:13	-2.94435	119.461	9.25	3.2
2018-11-05	19:32:55	-0.555779	119.859	8.994	3.3
2018-11-05	19:36:38	-2.76585	119.431	6.486	2.7
2018-11-05	19:51:59	-2.92179	119.42	7.606	2.5
2018-11-05	20:01:23	-2.88489	119.501	11.356	3
2018-11-05	20:03:55	-2.89342	119.554	15.631	2.7
2018-11-05	20:08:26	-2.89741	119.463	11.35	2.2
2018-11-05	20:24:59	-2.80487	119.478	12.602	3.2
2018-11-05	20:39:32	-2.77116	119.585	7.319	2.6
2018-11-05	20:50:36	-2.76147	119.532	16.905	3
2018-11-05	21:39:11	-2.91143	119.474	10.393	3.9
2018-11-05	22:08:45	-2.81686	119.449	11.993	2.4
2018-11-05	22:27:11	-1.24161	119.185	19.504	3.2
2018-11-05	22:30:15	-2.91489	119.477	9.011	2.4
2018-11-05	22:32:38	-2.87993	119.471	9.152	3.1
2018-11-05	23:05:32	-2.42159	119.634	10.003	2.9
2018-11-06	00:25:25	-2.79143	119.441	9.923	3.4
2018-11-06	01:20:45	-2.76643	119.504	13.41	2.4
2018-11-06	01:56:16	-2.63254	119.481	10.359	3
2018-11-06	02:03:04	-2.6614	119.396	6.346	2.6
2018-11-06	02:06:14	-2.78354	119.431	11.895	2.7
2018-11-06	02:17:26	-2.87844	119.474	11.686	2.7
2018-11-06	02:21:36	-2.73609	119.491	10.934	2.7
2018-11-06	03:18:40	-2.94668	119.498	9.571	4.5
2018-11-06	04:33:42	-2.79431	119.444	11.691	2.6
2018-11-06	04:51:19	-2.85798	119.493	10.396	3.3
2018-11-06	06:16:07	-2.82153	119.484	10.63	3
2018-11-06	07:18:58	-2.90785	119.762	15.085	2.7
2018-11-06	08:25:55	-2.72924	119.458	11.893	3
2018-11-06	10:47:45	-2.81248	119.462	11.989	3.4
2018-11-06	12:00:38	-2.87262	119.467	8.805	3
2018-11-06	12:05:12	-2.88026	119.432	8.536	3
2018-11-06	12:48:45	-2.89959	119.44	9.411	3.5
2018-11-06	12:58:01	-2.9254	119.507	10.373	3.4
2018-11-06	13:21:36	-2.78818	119.67	26.55	2.6
2018-11-06	13:32:38	-2.43443	119.442	9.989	3.4
2018-11-06	14:27:20	-2.88816	119.453	10.002	3.9
2018-11-06	14:47:11	-2.92544	119.459	9.023	4.7
2018-11-06	16:24:47	-2.73175	119.448	7.572	2.7
2018-11-06	17:17:41	-2.66631	119.487	9.229	3.4
2018-11-06	17:27:18	-2.78282	119.502	12.851	2.8
2018-11-06	17:45:31	-2.92065	119.46	8.884	3.3
2018-11-06	18:37:58	-2.76299	119.462	10.333	2.6
2018-11-06	22:04:06	-2.97501	119.491	19.443	2.4
2018-11-06	22:15:49	-2.74818	119.414	7.048	3.5
2018-11-06	23:29:08	-2.75	119.496	11.923	2.5
2018-11-07	01:43:06	-2.71345	119.455	10.3	2.9
2018-11-07	03:50:30	-2.70554	119.493	12.583	2.6
2018-11-07	04:39:39	-2.8483	119.479	13.072	2.5
2018-11-07	04:50:05	-2.44346	120.947	8.186	3.2
2018-11-07	08:14:15	-2.82002	119.465	5.991	3.3
2018-11-07	08:51:58	-2.70575	119.424	6.969	3.4
2018-11-07	09:42:25	-2.94126	119.443	6.474	5
2018-11-07	09:52:07	-2.88232	119.41	7.22	4.2
2018-11-07	09:53:12	-2.9623	119.424	7.007	4.3
2018-11-07	10:04:47	-2.70006	119.419	5.668	2.9
2018-11-07	10:07:59	-2.98296	119.484	13.43	2.9
2018-11-07	10:11:30	-2.73202	119.562	11.099	2.9
2018-11-07	10:23:19	-2.72305	119.448	4.768	3.1
2018-11-07	10:29:33	-2.92507	119.468	9.231	2.4
2018-11-07	10:41:38	-2.85449	119.411	7.368	3.5
2018-11-07	10:49:58	-2.86554	119.437	8.704	3.5
2018-11-07	11:17:17	-2.77285	119.459	8.399	2.8
2018-11-07	11:20:29	-2.72643	119.512	17.716	2.8
2018-11-07	11:27:35	-2.83882	119.449	7.454	3.2
2018-11-07	11:32:54	-2.86255	119.415	4.604	2.9
2018-11-07	11:40:04	-2.75109	119.468	9.77	2.4
2018-11-07	11:41:08	-2.98329	119.425	5.31	2.5
2018-11-07	11:46:13	-2.91565	119.428	8.377	3.5
2018-11-07	11:55:06	-2.89036	119.51	12.388	3.2
2018-11-07	12:14:22	-2.69723	119.507	9.413	2.7
2018-11-07	12:17:04	-2.93201	119.43	6.301	2.5
2018-11-07	12:37:37	-2.99072	119.44	3.566	4.2
2018-11-07	12:40:42	-2.91044	119.461	8.989	4.2
2018-11-07	12:54:08	-2.83579	119.472	9.785	2.5
2018-11-07	12:59:28	-2.97829	119.444	4.975	3.8
2018-11-07	13:56:38	-2.96717	119.462	10.134	2.9
2018-11-07	14:20:24	-2.75343	119.416	7.953	3.2
2018-11-07	14:28:11	-2.88853	119.495	10.399	2.9
2018-11-07	14:36:19	-2.88164	119.421	9.646	2.5
2018-11-07	14:37:07	-2.93175	119.422	8.384	2.7
2018-11-07	14:50:13	-2.75116	119.485	13.823	2.6
2018-11-07	14:52:49	-2.82814	119.422	9.987	3.4
2018-11-07	15:27:37	-2.75914	119.437	8.315	3.1
2018-11-07	15:46:43	-2.89103	119.494	13.482	3.2
2018-11-07	16:17:24	-3.13552	119.599	11.792	2.4
2018-11-07	16:22:55	-3.00691	119.505	12.132	2.5
2018-11-07	16:25:17	-2.99141	119.481	22.21	2.5
2018-11-07	16:34:10	-2.87347	119.451	9.373	3.1
2018-11-07	16:37:23	-2.98999	119.473	9.701	2.9
2018-11-07	17:10:29	-2.79859	119.434	8.2	2.5
2018-11-07	17:22:34	-2.92699	119.453	10.751	2.8
2018-11-07	17:50:35	-2.91248	119.458	11.074	2.8
2018-11-07	17:57:58	-2.85645	119.468	7.249	2.8
2018-11-07	18:01:37	-2.7474	119.5	9.375	2.5
2018-11-07	18:18:03	0.202506	119.708	16.597	3.5
2018-11-07	18:47:44	-2.92797	119.504	14.144	3
2018-11-07	19:04:51	-3.04085	119.502	10.799	4.2
2018-11-07	19:12:49	-2.90171	119.454	10.883	2.7
2018-11-07	19:16:33	-2.90634	119.476	12.753	2.3
2018-11-07	19:20:53	-2.84013	119.422	7.743	3.1
2018-11-07	20:12:29	-2.78071	119.459	8	3
2018-11-07	20:49:14	-2.81177	119.437	10.109	2.7
2018-11-07	20:54:40	-2.91109	119.428	3.588	3.3
2018-11-07	21:07:55	-2.99738	119.42	3.972	3.1
2018-11-07	21:14:07	-2.87412	119.472	9.684	2.8
2018-11-07	21:22:34	-2.85619	119.464	9.974	3.7
2018-11-07	21:22:35	-2.88928	119.476	10.403	3.6
2018-11-08	02:09:16	-2.787	119.472	12.484	3.3
2018-11-08	02:31:55	-2.75526	119.448	10.266	3.3
2018-11-08	02:38:36	-2.80893	119.373	5.538	3
2018-11-08	03:52:08	-2.93475	119.453	12.194	3.2
2018-11-08	05:14:42	-2.63502	119.571	14.028	2.9
2018-11-08	06:19:50	-2.79512	119.524	16.933	2.5
2018-11-08	06:57:31	-2.74081	119.515	13.641	2.6
2018-11-08	07:40:13	-2.79607	119.45	9.939	2.8
2018-11-08	08:30:24	-2.87789	119.486	13.315	3.5
2018-11-08	08:34:21	-2.88111	119.488	12.926	2.5
2018-11-08	09:08:57	-2.75103	119.427	8.707	3.1
2018-11-08	10:23:26	-3.03495	119.456	10.869	3
2018-11-08	10:35:08	-0.62868	119.963	13.472	3.6
2018-11-08	10:43:35	-2.81905	119.453	12.359	3.2
2018-11-08	10:45:36	-2.87356	119.46	13.417	2.9
2018-11-08	11:01:39	-2.86953	119.492	12.705	2.5
2018-11-08	11:16:01	-2.71047	119.416	10.843	2.8
2018-11-08	11:17:16	-2.5796	119.613	11.918	2.8
2018-11-08	12:09:57	-2.78188	119.436	9.286	3.5
2018-11-08	13:40:14	-2.92879	119.481	11.184	5.2
2018-11-08	13:56:54	-2.94947	119.453	6.972	4.2
2018-11-08	15:09:44	-2.90024	119.515	8.638	2.9
2018-11-08	15:23:59	-2.81407	119.476	8.152	2.9
2018-11-08	15:32:47	-2.66828	119.379	6.265	3
2018-11-08	17:25:44	-2.92729	119.431	8.504	4
2018-11-08	18:42:54	-2.91647	119.374	8.678	4.5
2018-11-08	18:53:50	-2.72513	119.487	12.504	2.5
2018-11-08	18:55:41	-2.95739	119.552	11.579	3.3
2018-11-08	18:56:30	-2.73048	119.501	11.346	2.9
2018-11-08	18:57:59	-2.77308	119.395	9.06	2.8
2018-11-08	19:08:58	-2.69696	119.421	5.812	2.7
2018-11-08	19:11:58	-2.73993	119.527	11.235	3.3
2018-11-08	19:27:29	-2.6987	119.414	4.67	3
2018-11-08	20:17:27	-2.90931	119.448	12.246	2.4
2018-11-08	20:26:07	-2.68803	119.509	9.919	2.6
2018-11-08	20:39:36	-2.89738	119.521	8.469	3.8
2018-11-08	20:57:16	-2.71269	119.469	13.563	2.9
2018-11-08	21:23:41	-2.67538	119.568	10.433	3.7
2018-11-08	21:33:06	-2.89746	119.499	9.374	4
2018-11-08	21:40:36	-2.83642	119.503	13.097	2.7
2018-11-08	21:50:22	-3.02519	119.423	7.227	3.1
2018-11-08	22:14:00	-2.81121	119.428	6.339	2.4
2018-11-08	22:18:03	-2.91329	119.437	11.661	2.8
2018-11-09	03:24:04	-2.9378	119.434	8.953	3.5
2018-11-09	03:27:07	-2.93862	119.428	8.413	2.9
2018-11-09	03:51:43	-3.07674	119.49	5.913	2.4
2018-11-09	04:16:52	-2.83282	119.426	10.308	2.7
2018-11-09	04:25:56	-2.75688	119.467	9.672	3.2
2018-11-09	04:38:57	-2.91341	119.469	11.211	3
2018-11-09	06:26:16	-2.69434	119.43	6.279	2.5
2018-11-09	08:05:21	-2.81993	119.452	9.513	2.8
2018-11-09	09:12:34	-2.75872	119.436	8.836	2.3
2018-11-09	10:28:21	-2.9478	119.461	7.031	3.9
2018-11-09	11:26:11	-2.87004	119.419	7.414	2
2018-11-09	11:38:57	-0.443801	119.793	15.769	3.3
2018-11-09	12:53:14	-2.96158	119.346	3.314	3
2018-11-09	14:21:12	-2.69861	119.429	8.021	2.8
2018-11-09	14:33:06	-2.79518	119.453	10.273	2.4
2018-11-09	15:12:47	-2.77723	119.454	9.188	2.9
2018-11-09	15:15:36	-2.7797	119.49	8.367	2.9
2018-11-09	16:24:57	-2.8059	119.418	5.004	2.6
2018-11-09	19:27:54	-2.59208	119.548	10.828	2.6
2018-11-09	19:37:18	-2.62742	119.451	9.618	2.8
2018-11-09	20:22:42	-2.65932	119.489	11.42	3
2018-11-09	21:58:56	-2.68681	119.479	7.708	2.7
2018-11-10	03:18:10	-2.88467	119.52	12.635	2.8
2018-11-10	04:04:10	-2.80041	119.416	9.049	3.8
2018-11-10	04:22:38	-2.73547	119.464	9.5	2.7
2018-11-10	04:40:07	-2.74476	119.425	8.983	3.8
2018-11-10	07:01:03	-2.66765	119.426	11.173	2.7
2018-11-10	07:04:44	-2.79176	119.442	5.436	2.9
2018-11-10	09:24:28	-2.84685	119.495	8.38	2.7
2018-11-10	10:17:43	-2.9279	119.422	6.11	4.4
2018-11-10	15:17:43	-2.82481	119.405	6.058	3.5
2018-11-10	16:02:02	-2.87369	119.413	6.427	2.5
2018-11-10	16:11:09	-2.72999	119.474	6.399	2.8
2018-11-10	16:33:45	-2.86175	119.43	8.286	2.9
2018-11-10	20:44:47	-2.89361	119.451	9.504	2.5
2018-11-10	20:51:16	-2.7848	119.559	12.701	2.4
2018-11-10	20:52:53	-2.8445	119.44	8.6	2.8
2018-11-11	03:11:57	-2.8067	119.467	15.575	2.5
2018-11-11	04:54:13	-2.78182	119.506	11.687	2.6
2018-11-11	04:55:55	-2.82266	119.467	7.685	2.8
2018-11-11	05:28:14	-2.72065	119.435	10.247	2.8
2018-11-11	06:04:35	-2.76852	119.47	10.817	2.8
2018-11-11	06:15:39	-2.7077	119.573	14.789	3
2018-11-11	07:51:57	-2.88765	119.441	11.819	2.7
2018-11-11	09:18:48	-2.74151	119.503	13.972	2.5
2018-11-11	09:41:34	-2.78296	119.436	10.264	3.5
2018-11-11	12:43:56	-2.79213	119.428	9.985	2.5
2018-11-11	13:31:19	-0.810033	120.053	13.94	3.2
2018-11-11	13:41:46	-2.77041	119.508	8.968	2.7
2018-11-11	14:27:39	-2.79847	119.465	10.765	2.9
2018-11-11	15:48:22	-2.87013	119.404	6.176	2.9
2018-11-11	16:17:39	-0.831439	119.798	28.965	3.2
2018-11-11	16:34:12	-2.9596	119.479	8.962	4.3
2018-11-11	17:28:30	-2.76109	119.378	11.226	2.4
2018-11-11	17:42:37	-2.68658	119.488	14.811	3
2018-11-11	17:44:08	-2.9248	119.475	10.4	3
2018-11-11	18:21:11	-2.56724	119.646	28.75	2.5
2018-11-11	18:28:10	-1.25662	120.561	9.378	3.8
2018-11-11	19:26:43	-2.70513	119.431	10.314	2.1
2018-11-11	20:26:26	-2.82791	119.475	13.1	2.7
2018-11-11	20:30:06	-2.87626	119.494	15.95	3.3
2018-11-11	20:52:01	-2.93214	119.441	6.88	2.2
2018-11-11	23:47:27	-2.74147	119.44	11.895	3
2018-11-12	00:50:04	-2.80438	119.474	13.158	2.6
2018-11-12	01:31:43	-2.82601	119.472	12.363	2.6
2018-11-12	02:48:05	-2.9815	119.487	11.819	3.6
2018-11-12	08:12:39	-2.86551	119.43	6.707	2.9
2018-11-12	08:26:57	-2.94169	119.422	5.168	4.3
2018-11-12	09:14:37	-2.92137	119.409	10.33	2.8
2018-11-12	09:27:56	-2.76872	119.522	11.007	2.4
2018-11-12	09:51:21	-2.85792	119.483	6.861	3.2
2018-11-12	13:28:29	-2.7708	119.404	6.583	2.4
2018-11-12	15:00:46	-2.74525	119.491	15.957	3.7
2018-11-12	17:08:55	-2.71383	119.403	6.353	2.3
2018-11-12	20:28:03	-1.42004	120.083	10.6	3.9
2018-11-12	20:30:17	-2.79196	119.401	8.232	3.2
2018-11-12	20:38:59	-1.7911	120.479	10.69	4.8
2018-11-12	20:48:18	-2.92377	119.458	9.131	3
2018-11-12	20:52:34	-2.80101	119.461	9.135	2.9
2018-11-12	21:36:51	-2.92518	119.485	7.467	2.6
2018-11-12	22:17:46	-2.81478	119.434	10.345	2.8
2018-11-12	23:48:17	-2.54671	119.537	8.716	2.6
2018-11-13	04:43:39	-1.20026	120.523	11.725	3.2
2018-11-13	05:35:34	-2.83292	119.423	9.374	3
2018-11-13	06:03:19	-1.12483	120.511	10.404	3.5
2018-11-13	09:01:03	-2.75698	119.447	12.413	2.8
2018-11-13	09:55:36	-2.7821	119.603	12.774	2.4
2018-11-13	10:14:39	-2.81823	119.461	10.211	3.1
2018-11-13	10:21:54	-2.74799	119.494	11.505	2.5
2018-11-13	12:14:01	-2.92399	119.49	11.815	3.6
2018-11-13	14:42:06	-2.89437	119.507	11.472	3.3
2018-11-13	15:32:58	-2.96042	119.414	7.875	2.8
2018-11-13	17:37:36	-2.90258	119.558	11.918	2.4
2018-11-13	17:48:44	0.041596	119.693	21.153	3.3
2018-11-13	19:04:07	-1.78143	120.868	11.039	4.7
2018-11-13	19:20:10	-1.70067	120.89	11.155	3.2
2018-11-13	19:53:16	-2.991	119.442	8.897	3.7
2018-11-13	20:16:50	-2.84529	119.406	9.58	2.8
2018-11-13	20:20:39	-2.85017	119.388	8.054	3.2
2018-11-13	20:58:30	-2.98617	119.482	12.435	3.1
2018-11-13	20:58:30	-2.94842	119.417	9.084	3.2
2018-11-13	21:17:25	-2.87962	119.435	8.481	2.7
2018-11-13	22:49:22	-2.86867	119.498	14.627	2.6
2018-11-14	00:37:15	-2.85959	119.498	11.814	2.9
2018-11-14	00:42:05	-2.74726	119.429	7.734	3.2
2018-11-14	00:59:12	-2.95514	119.47	11.293	3.5
2018-11-14	02:19:41	-3.01367	119.506	13.828	3.3
2018-11-14	04:09:46	-2.76139	119.459	9.343	3.1
2018-11-14	04:55:46	-2.83587	119.54	15.045	2.4
2018-11-14	05:28:25	-1.8401	120.547	9.722	3.1
2018-11-14	18:54:50	-2.94321	119.461	7.091	2.4
2018-11-14	19:17:44	-2.90996	119.537	14.198	2.5
2018-11-14	21:20:39	-3.01298	119.451	8.541	4.5
2018-11-14	22:02:46	-2.91857	119.404	8.169	2.8
2018-11-14	22:33:15	-2.7448	119.406	7.587	2.6
2018-11-14	22:45:08	-2.85267	119.45	9.421	3.4
2018-11-14	23:01:21	-2.94373	119.461	8.753	5.4
2018-11-14	23:10:08	-2.96509	119.492	8.248	4.5
2018-11-14	23:19:00	-2.99244	119.453	7.744	4
2018-11-14	23:25:15	-2.91137	119.465	9.715	4.3
2018-11-14	23:31:25	-2.92547	119.482	8.647	5.1
2018-11-15	00:05:07	-2.95422	119.501	9.904	3.6
2018-11-15	00:12:13	-2.6415	119.534	13.149	3
2018-11-15	00:26:57	-2.7642	119.52	8.769	2.8
2018-11-15	00:34:16	-2.98053	119.467	10.599	4.1
2018-11-15	00:43:25	-2.93329	119.451	11.257	3.3
2018-11-15	00:46:55	-2.93096	119.483	11.966	3.2
2018-11-15	00:57:08	-2.92657	119.438	6.165	2.8
2018-11-15	01:00:16	-2.97553	119.513	11.323	3.3
2018-11-15	01:25:43	-2.92151	119.454	11.872	3.8
2018-11-15	01:30:37	-2.83384	119.453	10.217	3
2018-11-15	01:38:26	-2.82044	119.436	10.127	3.1
2018-11-15	01:43:26	-2.8314	119.458	9.599	2.9
2018-11-15	01:52:53	-2.91665	119.42	10.184	3.7
2018-11-15	02:13:57	-2.89036	119.491	13.331	3.1
2018-11-15	02:40:13	-2.93617	119.513	19.915	2.6
2018-11-15	02:57:04	-2.73914	119.436	11.908	2.8
2018-11-15	03:04:56	-2.88429	119.501	14.802	2.3
2018-11-15	03:11:23	-2.8393	119.505	9.542	2.5
2018-11-15	03:14:29	-2.84355	119.453	10.049	3.2
2018-11-15	03:18:07	-2.93328	119.48	10.519	2.6
2018-11-15	03:21:52	-2.91352	119.462	14.634	2.6
2018-11-15	03:32:39	-2.8954	119.497	12.414	2.8
2018-11-15	03:51:18	-2.89174	119.484	13.201	2.6
2018-11-15	03:55:02	-2.98962	119.441	11.029	4.9
2018-11-15	04:07:24	-2.98739	119.485	13.408	2.9
2018-11-15	04:11:37	-2.86898	119.454	9.796	3
2018-11-15	04:24:26	-2.97053	119.464	12.036	3.5
2018-11-15	05:09:10	-2.95431	119.548	14.38	2.4
2018-11-15	05:21:23	-2.8254	119.448	7.114	2.9
2018-11-15	05:38:28	-2.8303	119.42	7.634	3.1
2018-11-15	05:40:36	-2.88304	119.519	8.191	2.6
2018-11-15	06:18:20	-2.61288	119.503	9.577	2.8
2018-11-15	06:20:55	-2.8417	119.404	4.474	2.7
2018-11-15	06:42:25	-2.93588	119.505	12.464	2.7
2018-11-15	06:55:50	-2.88268	119.46	9.565	2.9
2018-11-15	07:05:41	-2.83013	119.433	9.371	2.7
2018-11-15	07:12:29	-2.88561	119.477	10.973	3.2
2018-11-15	07:46:35	-2.81269	119.452	10.863	2.7
2018-11-15	08:20:37	-2.84569	119.383	5.86	3.2
2018-11-15	09:02:03	-1.62216	120.288	10.316	4
2018-11-15	09:09:23	-2.90175	119.479	13.659	3.2
2018-11-15	09:17:53	-2.88568	119.483	11.642	3.3
2018-11-15	09:28:55	-2.92977	119.552	13.055	4
2018-11-15	10:20:30	-2.83326	119.534	11.833	2.4
2018-11-15	10:30:05	-2.88255	119.422	9.429	2.7
2018-11-15	10:32:35	-2.76021	119.535	17.745	2.7
2018-11-15	10:33:57	-2.85526	119.509	10.903	2.7
2018-11-15	10:40:49	-2.83244	119.489	11.847	2.8
2018-11-15	11:17:54	-2.7899	119.463	14.183	2.5
2018-11-15	12:25:25	-2.75167	119.515	12.84	2.8
2018-11-15	12:33:31	-2.78151	119.434	9.417	3.5
2018-11-15	12:47:59	-2.83365	119.443	11.255	2.5
2018-11-15	13:18:38	-2.79488	119.484	9.248	2.4
2018-11-15	14:01:15	-1.66443	120.143	9.285	3.4
2018-11-15	14:20:18	-2.71694	119.43	10.337	2.7
2018-11-15	15:01:32	-1.56726	120.323	5.471	3.8
2018-11-15	15:04:26	-2.93473	119.407	8.443	3.3
2018-11-15	15:08:03	-2.96548	119.455	11.906	3.3
2018-11-15	16:50:38	-2.93813	119.547	12.918	3
2018-11-15	17:11:11	-2.92521	119.523	11.983	4.1
2018-11-15	17:58:37	-2.99087	119.431	10.13	3.2
2018-11-15	18:51:43	-2.94332	119.495	11.888	3.1
2018-11-15	19:00:35	-2.94923	119.486	12.125	3.1
2018-11-15	19:49:55	-2.95907	119.534	14.628	3.4
2018-11-15	19:57:50	-0.720696	119.834	19.975	3.2
2018-11-15	20:07:41	-2.78762	119.433	14.944	2.6
2018-11-15	20:42:45	-3.07321	119.508	16.276	2.2
2018-11-15	22:30:36	-2.61095	119.657	10.291	2.6
2018-11-15	22:40:37	-2.87226	119.404	8.981	2.8
2018-11-15	22:50:12	-2.78019	119.505	14.998	2.8
2018-11-15	23:51:33	-2.77117	119.429	8.084	3
2018-11-15	23:53:09	-1.20473	120.179	9.797	3.7
2018-11-16	00:31:14	-2.94421	119.538	12.733	3.9
2018-11-16	04:04:54	-2.83555	119.527	10.141	2.2
2018-11-16	04:35:25	-2.78746	119.496	10.144	2.5
2018-11-16	04:41:33	-2.87874	119.461	7.907	2.8
2018-11-16	07:58:43	-2.68665	119.499	8.121	3.2
2018-11-16	08:02:49	-2.9354	119.482	9.135	4.3
2018-11-16	08:54:03	-2.95877	119.478	10.432	4
2018-11-16	09:24:19	-2.79397	119.602	19.541	2.9
2018-11-16	09:33:05	-2.71303	119.449	6.615	3.7
2018-11-16	11:48:18	-2.82055	119.521	15.337	2.5
2018-11-16	11:51:56	-2.86419	119.55	12.833	2.6
2018-11-16	12:09:54	-2.87632	119.585	17.013	2.5
2018-11-16	12:35:59	-2.95996	119.504	9.704	2.8
2018-11-16	14:13:04	-2.84244	119.499	9.362	2.5
2018-11-16	14:47:05	-2.79053	119.515	10.014	2.5
2018-11-16	14:59:18	-0.49246	119.842	11.489	3.7
2018-11-16	16:09:55	-2.80783	119.46	7.618	2.6
2018-11-16	18:49:09	-2.92576	119.473	11.125	2.9
2018-11-16	18:57:04	-2.75186	119.39	6.972	2.4
2018-11-16	19:19:22	-2.9328	119.507	11.349	4.1
2018-11-16	21:52:51	-2.87292	119.576	15.646	2.6
2018-11-17	07:00:55	-2.87469	119.513	13.927	3
2018-11-17	10:25:19	-2.78988	119.469	10.24	2.9
2018-11-17	11:01:33	-2.94783	119.493	10.003	3.4
2018-11-17	13:09:25	-2.93579	119.502	9.656	3.3
2018-11-17	13:31:33	-2.49306	120.98	11.828	3.4
2018-11-17	15:12:30	-2.88422	119.367	7.99	2.4
2018-11-17	15:22:42	-2.86885	119.442	9.499	2.4
2018-11-17	16:05:07	-2.75393	119.496	10.841	2.6
2018-11-17	17:03:22	-2.92927	119.488	8.852	2.8
2018-11-17	0.730556	-2.78978	119.44	9.692	2.5
2018-11-17	18:00:12	-2.93008	119.467	11.396	4.2
2018-11-17	18:16:26	-2.74911	119.475	12.742	2.3
2018-11-17	18:26:37	-2.72682	119.437	8.907	2.5
2018-11-17	18:36:16	-2.74235	119.421	7.224	2.1
2018-11-17	18:37:48	-2.94772	119.45	7.656	2.4
2018-11-17	18:43:57	-2.89379	119.481	13.394	2.4
2018-11-17	19:04:49	-2.70298	119.49	10.507	2.3
2018-11-17	19:07:20	-2.85822	119.465	9.014	2
2018-11-17	19:11:07	-2.93859	119.464	7.802	2.7
2018-11-17	19:20:11	-2.95611	119.526	12.642	2.2
2018-11-17	19:31:42	-2.96131	119.498	12.019	3.1
2018-11-17	19:57:49	-2.98064	119.45	8.754	2.6
2018-11-17	20:01:33	-2.72086	119.492	11.841	2.4
2018-11-17	20:17:56	-2.77368	119.531	14.706	2.4
2018-11-17	20:20:17	-2.85208	119.455	10.284	2.1
2018-11-17	20:46:15	-0.078149	119.879	10.006	4.1
2018-11-17	21:31:16	-2.93979	119.509	10.614	2.8
2018-11-17	21:37:59	-2.84676	119.484	8.138	2.1
2018-11-17	21:44:49	-2.91317	119.572	22.551	3
2018-11-17	21:46:19	-2.76667	119.515	11.741	2.5
2018-11-17	22:05:42	-2.75721	119.523	10.68	2.6
2018-11-17	22:08:44	-2.86403	119.358	4.199	2.7
2018-11-17	22:17:04	-2.70738	119.53	10.219	2.9
2018-11-17	22:19:22	-2.95607	119.443	7.245	3.1
2018-11-17	22:43:17	-2.56796	119.587	10.703	2.5
2018-11-17	23:28:08	-2.95833	119.431	10.365	2.9
2018-11-17	23:36:30	-2.77897	119.422	12.157	2.9
2018-11-17	23:41:21	-2.81764	119.344	4.379	2.7
2018-11-18	00:23:35	-3.06093	119.484	10.714	2.8
2018-11-18	00:25:31	-2.89813	119.458	11.013	3.3
2018-11-18	00:32:43	-2.74639	119.557	17.92	2.9
2018-11-18	00:40:46	-2.91512	119.393	9.276	2.9
2018-11-18	01:18:24	-2.92817	119.456	9.383	2.8
2018-11-18	01:20:43	-2.85812	119.484	8.639	2.9
2018-11-18	01:22:10	-2.78782	119.559	19.742	2.5
2018-11-18	02:09:13	-2.7183	119.448	8.353	3.2
2018-11-18	02:19:13	-2.70362	119.451	9.622	2.6
2018-11-18	03:05:24	-2.96227	119.51	11.007	3.1
2018-11-18	07:15:24	-2.72941	119.492	9.751	2.6
2018-11-18	08:56:06	-3.07622	119.464	11.486	2.6
2018-11-18	11:22:42	-2.97438	119.501	12.792	4.6
2018-11-18	14:00:16	-2.69382	119.519	11.67	3
2018-11-18	15:06:36	-2.95716	119.459	8.221	2.9
2018-11-18	16:55:07	-2.833	119.571	13.012	2.5
2018-11-18	20:15:25	-2.96888	119.512	12.698	3.6
2018-11-18	20:18:04	-0.646661	119.861	11.225	4.1
2018-11-18	21:02:10	-2.92654	119.537	12.163	2.9
2018-11-18	22:32:50	-2.978	119.505	12.187	3.5
2018-11-18	22:44:25	-2.83738	119.512	12.947	2.9
2018-11-18	22:50:51	-1.18173	120.454	11.046	3.3
2018-11-18	23:12:17	-2.80313	119.517	9.806	3.2
2018-11-19	00:21:20	-2.83694	119.479	9.475	2.8
2018-11-19	00:50:43	-2.56127	120.968	12.043	3.9
2018-11-19	06:21:32	-2.74668	119.443	4.787	3.1
2018-11-19	06:42:38	-2.84814	119.371	3.488	2.8
2018-11-19	06:48:43	-3.04113	119.395	6.563	2.5
2018-11-19	07:06:03	-2.7826	119.456	11.287	2.6
2018-11-19	07:10:42	-2.76403	119.526	9.289	2.6
2018-11-19	07:19:44	-2.89994	119.506	10.347	3
2018-11-19	07:23:23	-2.97944	119.491	8.017	4.2
2018-11-19	12:29:29	-2.78598	119.507	10.729	3
2018-11-19	15:12:54	-2.84009	119.481	7.666	2.7
2018-11-19	15:16:29	-2.85347	119.503	11.338	2.5
2018-11-19	15:36:32	-2.89264	119.524	11.516	3.4
2018-11-19	15:58:42	-2.95324	119.503	9.706	2.4
2018-11-19	16:01:17	-3.10306	119.495	6.056	2.5
2018-11-19	16:22:50	-2.85019	119.508	10.026	2.8
2018-11-19	16:28:58	-2.93969	119.502	10.034	2.4
2018-11-19	17:46:34	-2.94556	119.51	11.678	3.1
2018-11-19	18:05:29	-2.77747	119.502	7.859	2.2
2018-11-19	18:14:01	-2.84014	119.465	7.609	2
2018-11-19	18:28:33	-2.79421	119.503	9.825	2.7
2018-11-19	18:29:23	-2.83431	119.48	8.345	2.6
2018-11-19	18:36:30	-2.93611	119.513	11.634	3
2018-11-19	19:33:19	-2.93951	119.509	11.603	3
2018-11-19	20:21:57	-2.93144	119.494	8.537	3.1
2018-11-19	20:35:36	-2.95547	119.502	9.004	3.7
2018-11-19	21:55:20	-2.96043	119.418	6.707	2.6
2018-11-19	22:15:51	-2.80344	119.632	20.525	2.6
2018-11-19	22:25:02	-2.72335	119.429	13.097	3
2018-11-20	00:22:01	-2.79766	119.52	11.771	2.5
2018-11-20	01:38:15	-2.95145	119.531	9.197	4.4
2018-11-20	02:01:49	-2.72621	119.558	18.416	2.5
2018-11-20	02:07:49	-2.78236	119.509	9.611	3.1
2018-11-20	02:26:21	-2.86935	119.459	11.059	2.8
2018-11-20	03:14:23	-2.68997	119.416	8.738	2.8
2018-11-20	03:36:31	-1.28485	120.512	9.44	4
2018-11-20	04:12:42	-2.69197	119.605	14.426	2.6
2018-11-20	04:50:29	-2.93234	119.473	9.45	2.9
2018-11-20	04:54:22	-3.00315	119.453	9.704	4.4
2018-11-20	05:05:33	-2.83931	119.591	19.565	2.7
2018-11-20	05:52:50	-2.78843	119.381	7.83	3.2
2018-11-20	06:24:50	-2.80174	119.501	10.587	3.3
2018-11-20	06:28:14	-2.77677	119.515	13.603	2.9
2018-11-20	06:33:01	-2.79369	119.526	17.404	3.2
2018-11-20	07:07:56	-2.92388	119.51	12.279	2.9
2018-11-20	08:13:34	-2.8669	119.482	8.91	3.8
2018-11-20	09:13:20	-2.73623	119.542	13.864	2.8
2018-11-20	10:11:13	-2.75879	119.477	11.475	3
2018-11-20	10:55:06	-2.81919	119.428	8.952	2.9
2018-11-20	15:20:15	-2.8659	119.505	9.509	3.4
2018-11-20	16:04:48	-2.86488	119.493	11.342	2.6
2018-11-20	16:30:38	-2.90504	119.424	6.071	3.5
2018-11-20	16:34:05	-2.92175	119.475	9.337	3.5
2018-11-20	18:25:42	-2.81862	119.441	8.229	2.7
2018-11-20	19:13:19	-2.87771	119.473	8.6	3.1
2018-11-20	19:31:43	-2.80632	119.573	11.848	2.8
2018-11-21	02:02:43	-2.48834	119.375	17.743	3.5
2018-11-21	07:34:11	-2.79482	119.527	13.658	3.2
2018-11-21	07:58:57	-2.74984	119.424	14.382	3.5
2018-11-21	08:04:19	-2.91344	119.394	9.763	2.5
2018-11-21	08:52:28	-2.83932	119.391	12.173	2.3
2018-11-21	11:46:05	-2.86942	119.498	11.359	3.4
2018-11-21	12:54:14	-2.79	119.485	9.091	2.9
2018-11-21	14:44:18	-2.98189	119.536	9.561	2.4
2018-11-21	16:12:28	-2.80289	119.454	7.457	3
2018-11-21	16:54:12	-2.96454	119.497	10.306	2.8
2018-11-21	17:18:11	-2.95083	119.479	8.406	3.4
2018-11-21	17:40:15	-2.97086	119.495	10.457	2.6
2018-11-21	17:52:48	-3.05983	119.419	5.457	2.8
2018-11-21	17:54:56	-3.07356	119.433	5.968	2.8
2018-11-21	17:59:05	-2.94263	119.494	9.591	3.1
2018-11-21	18:15:35	-2.94634	119.511	10.829	3.1
2018-11-21	19:13:04	-2.82388	119.49	9.732	2.4
2018-11-21	19:21:50	-2.74757	119.418	11.668	3
2018-11-21	19:38:55	-2.93246	119.423	9.62	3.4
2018-11-21	21:22:06	-2.93613	119.49	9.585	3.1
2018-11-22	00:24:20	-2.72806	119.544	13.653	3
2018-11-22	00:42:44	-2.80047	119.507	11.125	2.6
2018-11-22	00:57:13	-2.84566	119.55	12.873	2.9
2018-11-22	01:21:15	-2.88568	119.523	11.438	3.2
2018-11-22	02:00:19	-2.82186	119.575	20.048	2.5
2018-11-22	02:48:09	-2.70951	119.628	16.019	2.7
2018-11-22	02:54:29	-2.7333	119.543	9.315	3.1
2018-11-22	04:32:53	-2.82208	119.514	9.671	3.1
2018-11-22	05:58:30	-2.90247	119.441	4.563	2.8
2018-11-22	11:20:20	-2.82258	119.459	10.192	3
2018-11-22	13:12:33	-1.65116	120.131	7.541	3.8
2018-11-22	13:33:24	-2.76587	119.491	12.159	2.5
2018-11-22	14:54:10	-2.7408	119.474	13.634	2.5
2018-11-22	14:56:31	-2.81121	119.436	8.576	2.9
2018-11-22	15:38:44	-2.88185	119.49	8.762	2.5
2018-11-22	16:05:46	-2.91191	119.381	6.2	3.1
2018-11-22	16:44:23	-2.98786	119.475	7.283	3
2018-11-22	17:21:24	-3.04476	119.447	9.174	3.3
2018-11-22	20:11:39	-2.78065	119.553	11.837	2.5
2018-11-22	20:23:26	-2.86433	119.45	8.029	2.1
2018-11-22	20:30:05	-2.74035	119.527	11.197	2.6
2018-11-22	20:56:26	-2.71328	119.51	11.914	2.8
2018-11-22	21:05:26	-3.05624	119.438	5.46	3.4
2018-11-22	22:06:04	-2.83656	119.439	8.773	2.8
